# Supplementary material
Source: publisher figshare collection journal article supplement (https://karger.figshare.com/ndownloader/files/8655076)
Supplement: Supplementary file 1 [file 8655076]

|  | **CLVO** | **ILVO** |
| --- | --- | --- |
|  |  |  |
| Anterior circulation, no (%) |  |  |
| extradural ICA | 31 (8.1) | - |
| Intradural ICA | 45 (11.8) | 2 (4.1) |
| MCA, M1 | 182 (47.5) | 26 (53.1) |
| MCA, M2 | 30 (7.8) | 1 (2) |
| ACA | 3 (0.8) | - |
|  |  |  |
| Posterior circulation, no (%) |  |  |
| BA | 78 (20.4) | 18 (36.7) |
| VA | 7 (1.6) | 1 (2) |
| PCA | 7 (1.6) | 1 (2) |

**Table S2**: Thrombus distribution.
